# Supplementary material
Source: Springer Nature journal article supplement (https://www.springermedizin.de/resource/supplementary/12936_2013_3707_MOESM7_ESM.pdf/9545166)

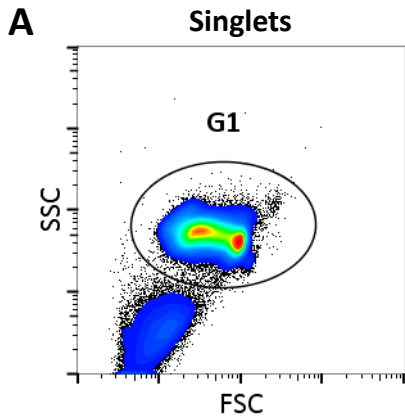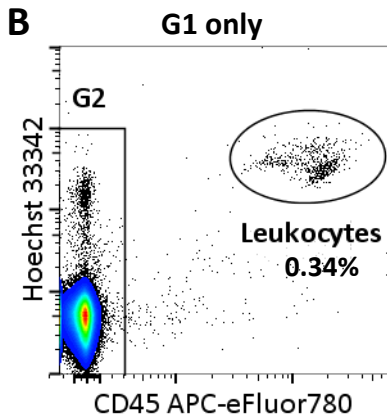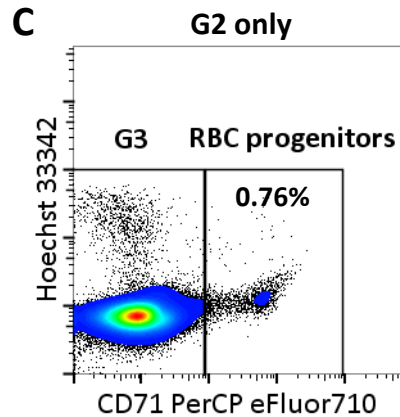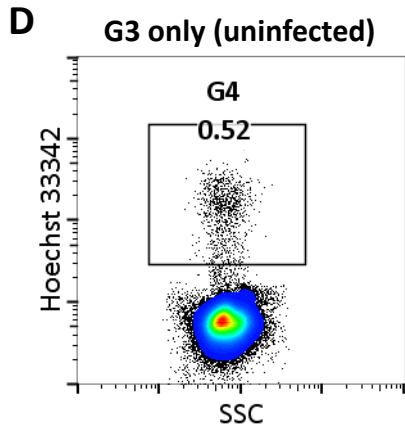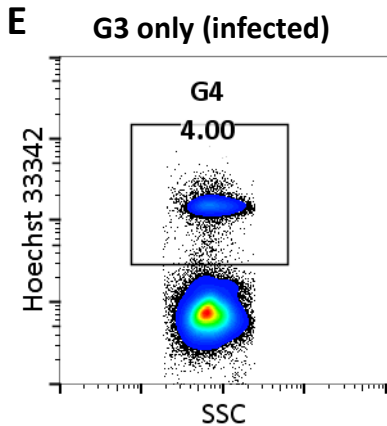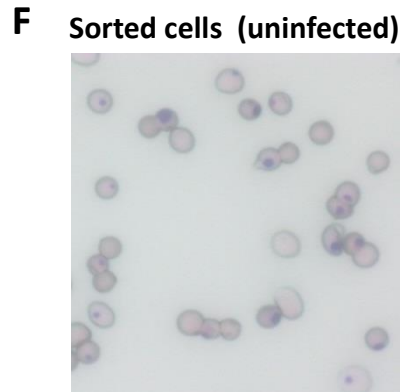

Supplement: MOESM7 [file 9545166]
